# Supplementary material
Source: Royal Society of Chemistry journal article supplement (doi:10.1039/d6nr00514d)
Supplement: d6nr00514d1.pdf [file d6nr00514d1.pdf]

## Atomic-Level Design Principles for Hydrogen Evolution Reaction on High-Entropy MXene Catalysts

Hao Yuan, Jing Yang and Yong-Wei Zhang\*

Institute of High Performance Computing (IHPC), Agency for Science, Technology and Research (A\*STAR), 1 Fusionopolis Way, #16-16 Connexis, Singapore 138632, Republic of Singapore

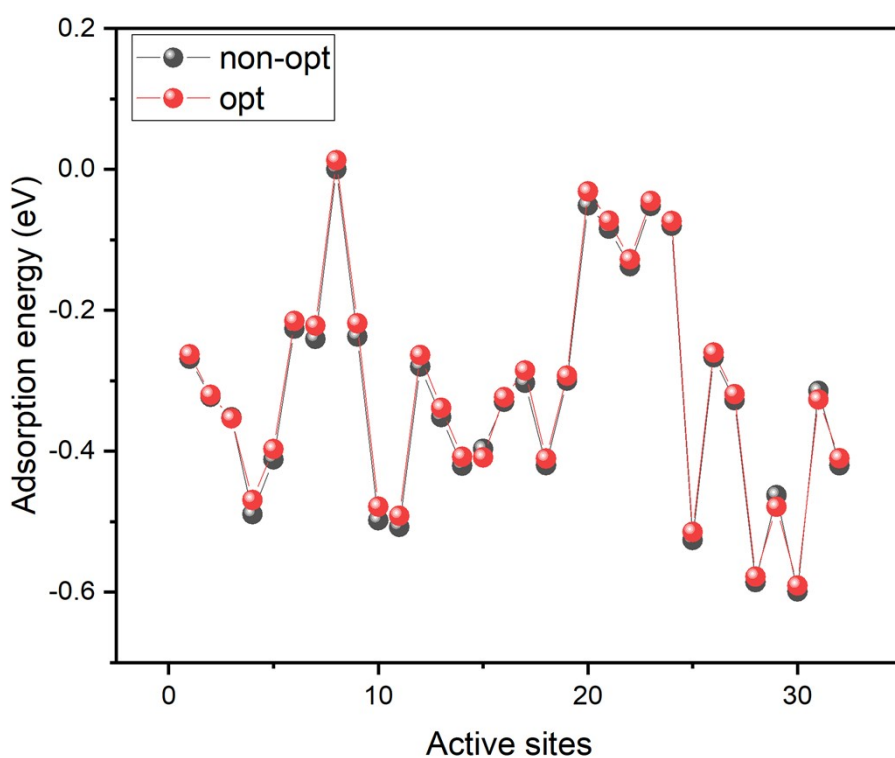

**Figure S1.** Comparison of hydrogen adsorption energies across 32 distinct active sites on the high-entropy MXene  $\text{Ti}_{12}\text{Nb}_{17}\text{V}_{24}\text{Mo}_{11}$ , evaluated using two different lattice constants: an optimized lattice ( $a = b = 12.11 \text{ \AA}$ , red) and a fixed lattice ( $a = b = 12.16 \text{ \AA}$ , black). Each data point represents the adsorption energy at a specific site. The close alignment between the two datasets indicates minimal sensitivity of hydrogen adsorption energy to lattice relaxation, validating the use of fixed-lattice approximations for high-throughput screening.

**Table S1.** Lattice constants and H adsorption free energies of selected MXenes and Pt.

|                                               | <b>Lattice constant (Å)</b> | <b><math>\Delta G</math> (eV)</b> |
|-----------------------------------------------|-----------------------------|-----------------------------------|
| Ti <sub>4</sub> C <sub>3</sub> O <sub>2</sub> | 3.04                        | -0.257                            |
| V <sub>4</sub> C <sub>3</sub> O <sub>2</sub>  | 2.92                        | -0.457                            |
| Nb <sub>4</sub> C <sub>3</sub> O <sub>2</sub> | 3.15                        | 0.363                             |
| Mo <sub>4</sub> C <sub>3</sub> O <sub>2</sub> | 3.05                        | -0.387                            |
| Pt                                            |                             | -0.32                             |

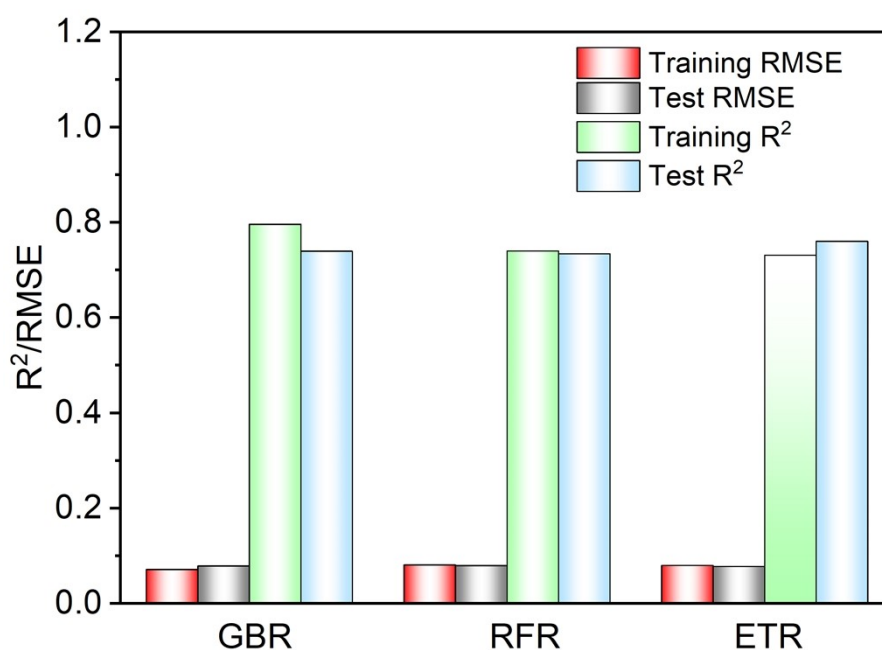

**Figure S2.** Comparison of predictive performance for three machine learning models: Gradient Boosting Regressor (GBR), Random Forest Regressor (RFR), and Extra Trees Regressor (ETR), evaluated using both training and test datasets. Bars represent four key performance metrics: Root Mean Square Error (RMSE) for training (red) and test sets (gray), and R<sup>2</sup> scores for training (green) and test sets (blue). A lower RMSE and higher R<sup>2</sup> indicate better model accuracy and generalizability.
